# Supplementary material
Source: PubMed Central journal article supplement (PMC3370587)
Supplement: supp_80.6.2247_IAI-IAI06371-11-s02.pdf [file supp_80.6.2247_IAI-IAI06371-11-s02.pdf]

## Supplemental Figure 1

Baseline

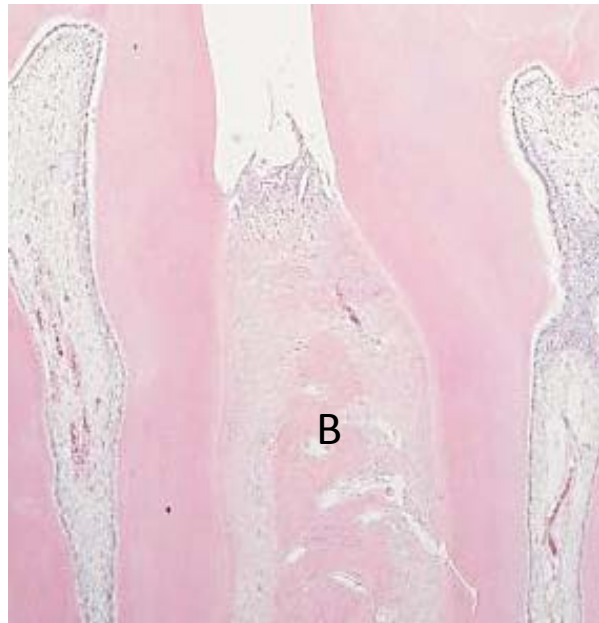

Infected

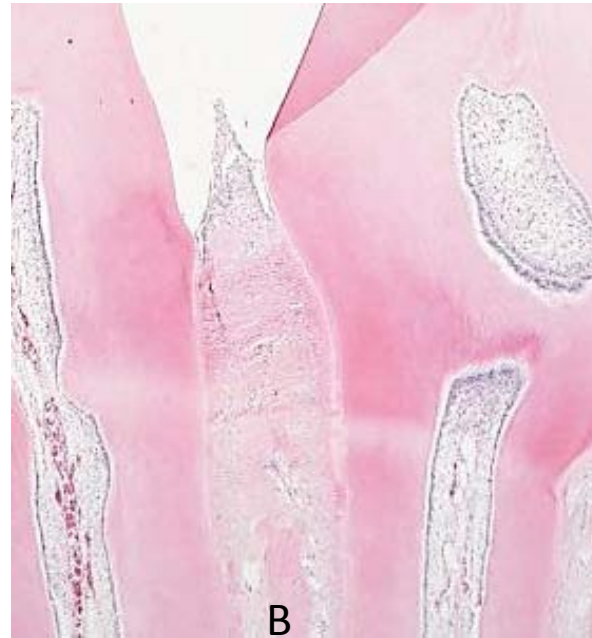

Antibiotic

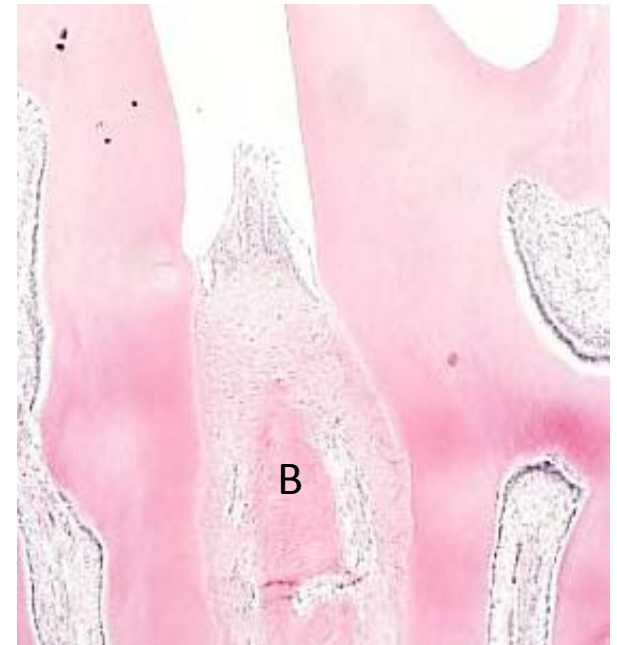

H &E stained sagittal section taken from GK diabetic rats at baseline, 5 weeks following *Aa* infection and *Aa* infection with antibiotic treatment for the last week.  
B= bone

## Supplemental Figure 2

Baseline

Infected

Antibiotic

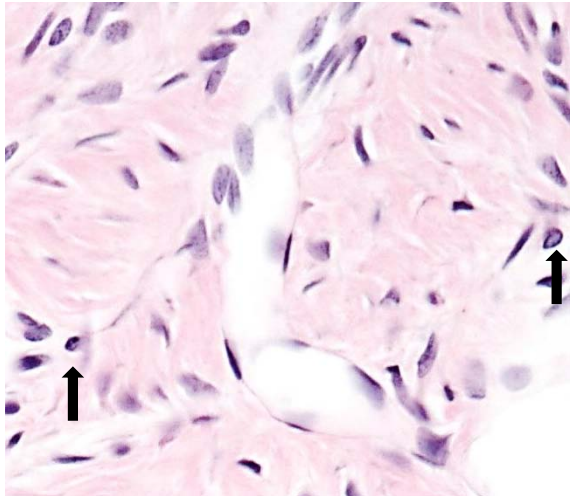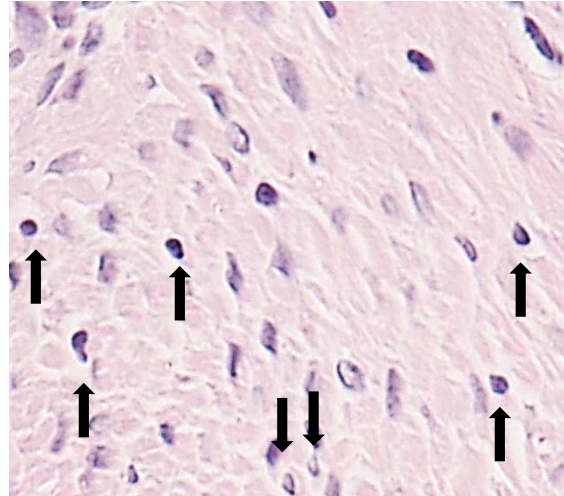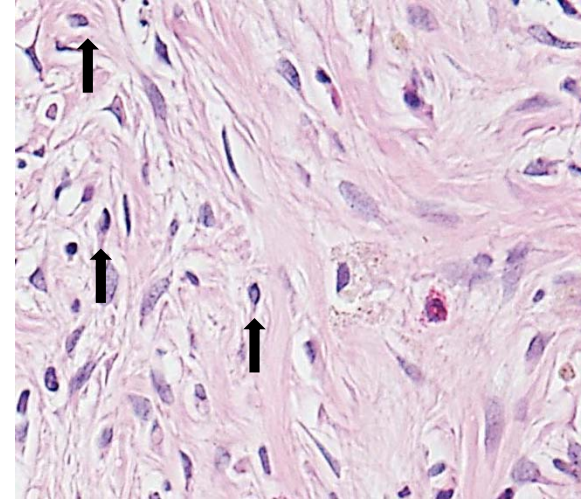

H &E stained sagittal section taken from sub-epithelial gingival connective tissue of GK diabetic rats at baseline, 5 weeks following *Aa* infection and *Aa* infection with antibiotic treatment for the last week. Arrows point to polymorphonuclear leukocytes.

# TNF- $\alpha$

Baseline

Infected

Antibiotic

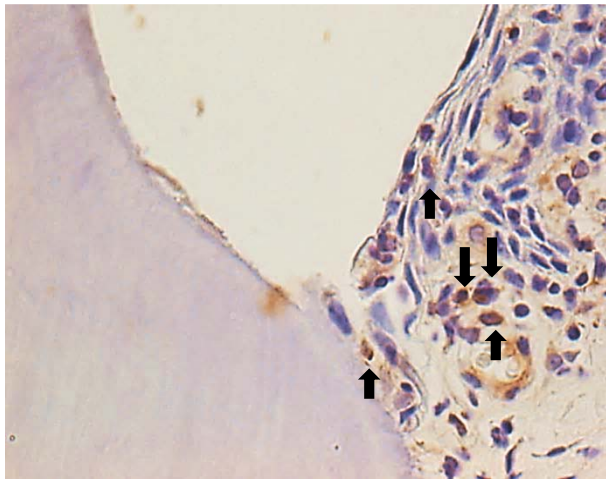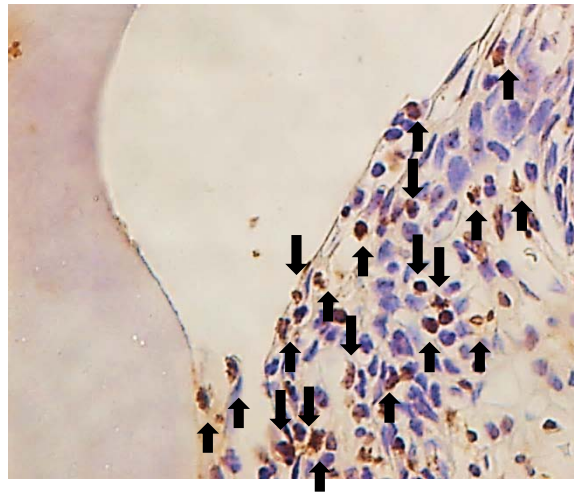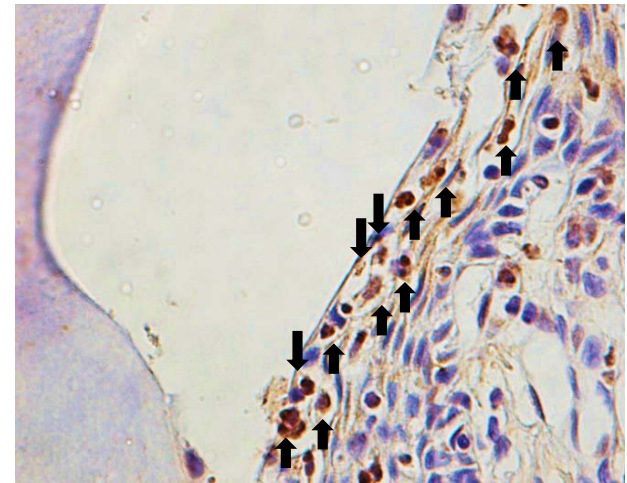

TNF expression in the epithelium of GK diabetic rats was assessed by immunohistochemistry with an anti-TNF- $\alpha$  specific antibody at baseline, 5 weeks following *Aa* infection and *Aa* infection with antibiotic treatment for the last week. No immunopositive cells were detected with matched control antibody (data not shown). Arrows point to TNF- $\alpha$  immunopositive cells (but not all positive cells).

## Supplemental Figure 4

Baseline

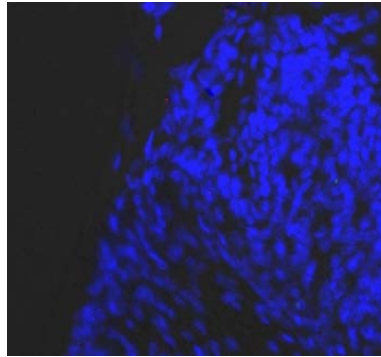

Infected

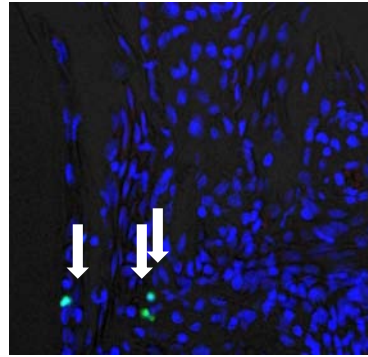

Antibiotic

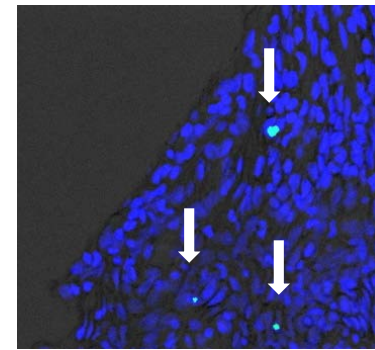

Apoptotic cells in the gingival epithelium of diabetic rats were detected by the TUNEL assay in histologic sections taken at baseline, 5 weeks following *Aa* infection and *Aa* infection with antibiotic treatment for the last week. Sections were counterstained with DAPI to show nuclei. Arrows point to TUNEL positive cells.
